# Supplementary material for: First principles of hydrazine electrooxidation at oxide-free and oxide-based palladium electrodes in complex media
Source: Royal Society of Chemistry journal article supplement (doi:10.1039/d3cp00829k), 2023-01-01
Supplement: d3cp00829k1.pdf [file d3cp00829k1.pdf]

## Supplementary Materials

### First principles of hydrazine electrooxidation at oxides-free and oxides-based palladium electrodes in complex media

E.V. Zolotukhina<sup>1</sup>, E.V. Butyrskaya<sup>2</sup>, M. Koch<sup>3</sup>,  
P. Herbeck-Engel<sup>3</sup>, M.G. Levchenko<sup>1</sup>, Y.E. Silina<sup>4,5\*</sup>

<sup>1</sup>*Federal Research Center of Problems of Chemical Physics and Medicinal Chemistry,  
Russian Academy of Sciences, 142432 Chernogolovka, Moscow region, Russia*

<sup>2</sup>*Department of Chemistry, Voronezh State University, Universitetskaya pl. 1,  
394006 Voronezh, Russia*

<sup>3</sup>*INM – Leibniz Institute for New Materials, Campus D2 2, 66123 Saarbrücken, Germany*

<sup>4</sup>*Institute of Biochemistry, Centre for Human and Molecular Biology (ZHMB),  
Saarland University, 66123 Saarbrücken, Germany*

<sup>5</sup>*KIST – Korea Institute of Science and Technology, Europe Forschungsgesellschaft,  
Saarbrücken, Germany, 66123 Campus E7 1, Saarbrücken, Germany*

*\*To whom the correspondence*

*should be addressed (Y.E. Silina)*

*Institute of Biochemistry, Centre for Human and Molecular Biology (ZHMB),  
Saarland University, Saarbrücken, Germany*

*Campus B 2.2, room 317*

*e-mail: [yuliya.silina@uni-saarland.de](mailto:yuliya.silina@uni-saarland.de) (E-Mail 1)*

*[yuliya.silina@gmx.de](mailto:yuliya.silina@gmx.de)(E-Mail 2)*

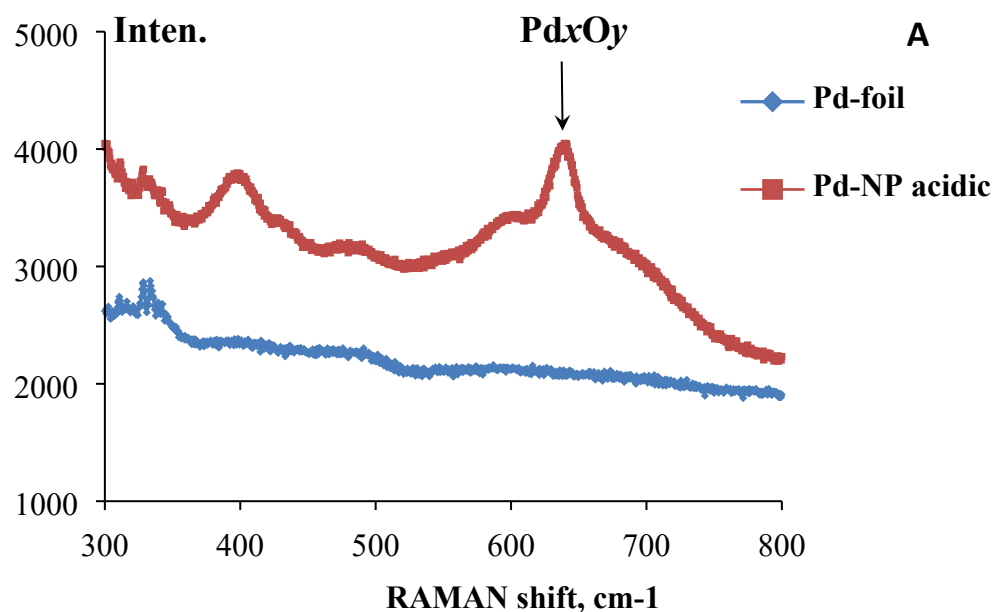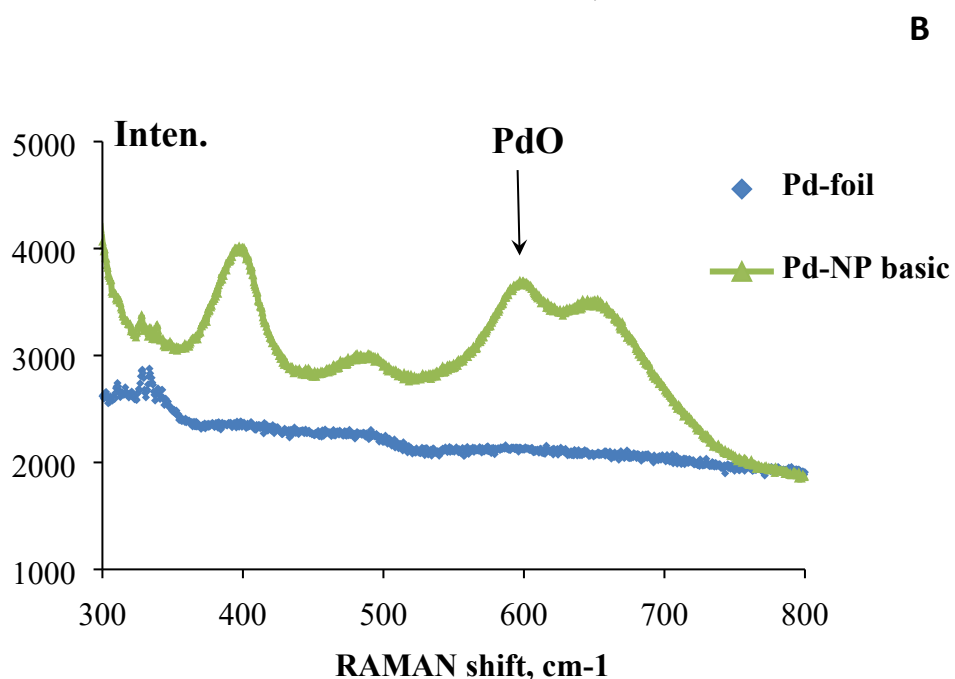

**Fig. S1** – RAMAN spectra recorded from sputtered Pd-foil (*blue lines*) and Pd-NPs-modified electrode synthesized at -2.5 mA for 30 s (*red and olive lines*): **A** – Pd-NPs were synthesized from the acidic electrolyte, pH = 2; **B** – Pd-NPs were synthesized from the basic electrolyte, pH = 9.3. *Note:* to avoid the interference caused by oxides and oxygen species present on the surface of screen printed electrodes (SPE) covered by graphene oxide (GO), for this set of experiments Pd-NPs were deposited on steel templates at the same electroplating conditions as shown in Experimental part for SPE/GO.

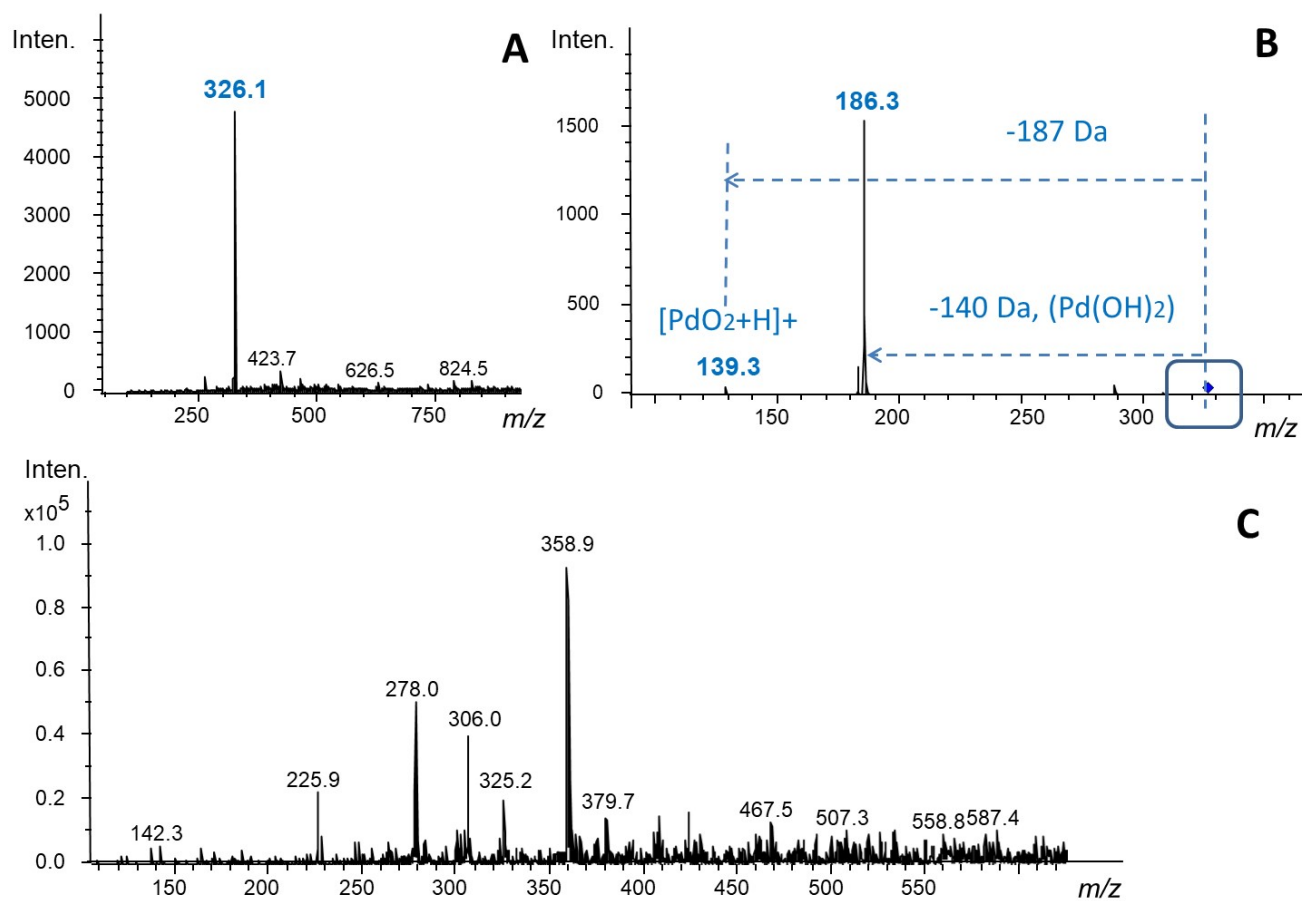

**Fig. S2** – LDI-MS spectra recorded in positive detection mode from the surface of SPE/GO modified by: basic Pd-NPs (**A** – full scan, **B** – MS/MS of peak at  $m/z$  326, CID 1 eV) and acidic Pd-NPs (**C**). Laser fluence 40%.

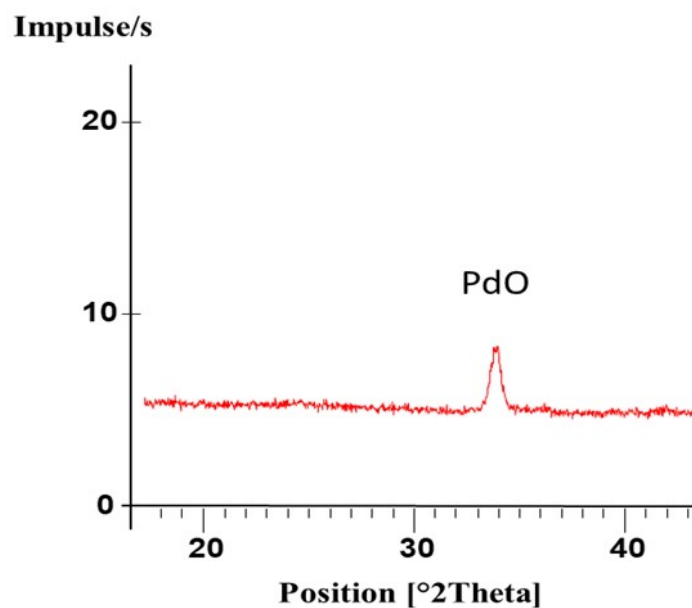

**Fig. S3** – XRD diffractogram focused on PdO peak recorded from the basic Pd-NPs (**sample 2**). *Note:* Contrary to Raman spectroscopy, XRD analysis allows characterizing only the largest particles.

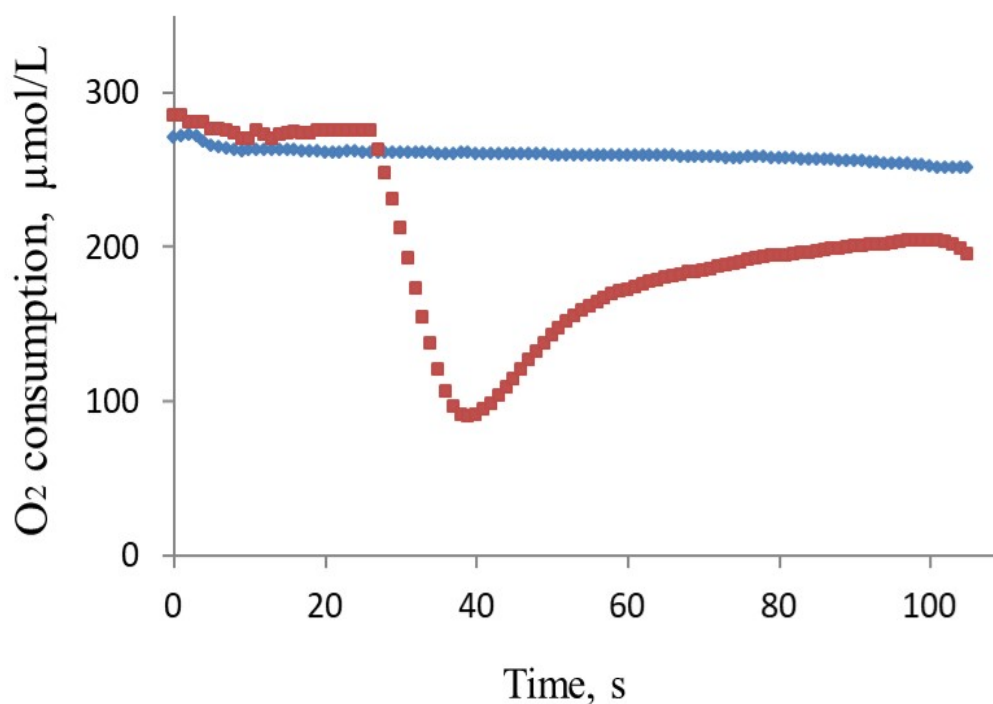

**Fig. S4** – Dynamic responses of the oxygen minisensor (oxygen consumption, µmol/L) recorded in HC medium from electrodes modified by: Pd-sputtered foil (blue line); basic Pd-NPs (red line), sample 4. *Note:* Pd-modified electrodes during oxygen minisensor studies were operated in CV mode during first 100 s, the experiments were performed at room temperature, 20±2 °C.

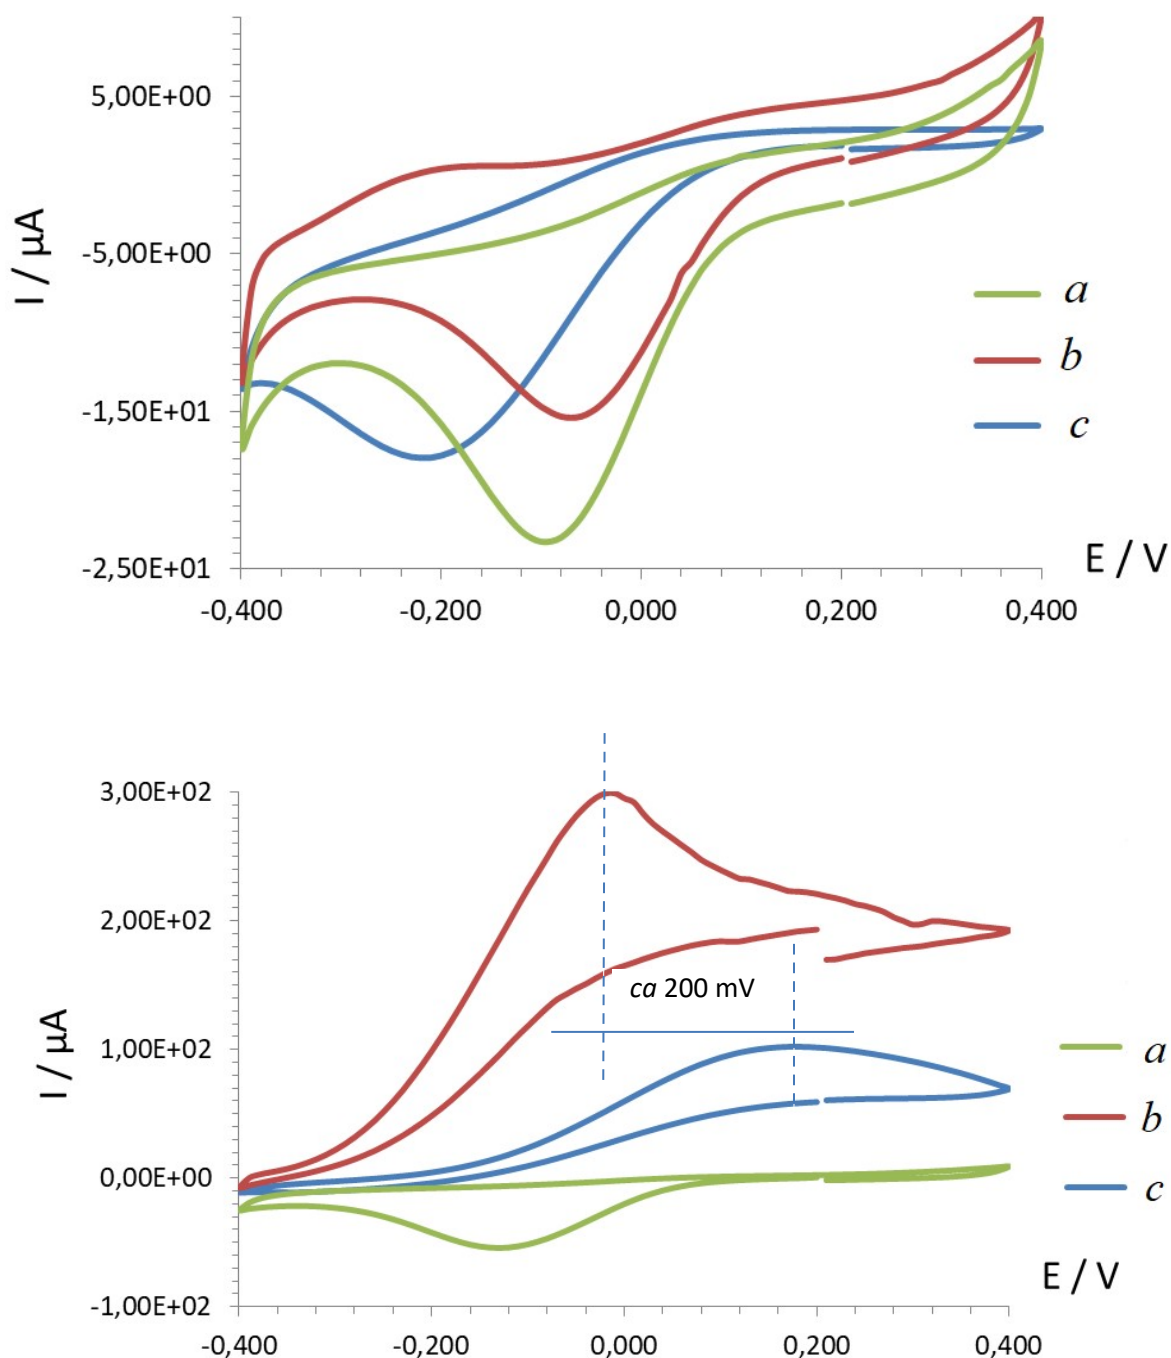

**Fig. S5** – CV plots (vs Ag/AgCl, second scans shown) obtained at 20 mV/s from Pd-NPs-modified electrode produced from the basic electrolyte (basic Pd-NPs) in 200  $\mu\text{M}$  (*top*) and 10 mM (*bottom*) of hydrazine solutions: *a* – CV plots recorded in acetate buffer; *b* – in a droplet of hydrazine solutions prepared in acetate buffer and dropped on the intact electrode surface; *c* – in a droplet of hydrazine solution dropped on the electrode surface after its heating at 200  $^{\circ}\text{C}$  for 20 min.

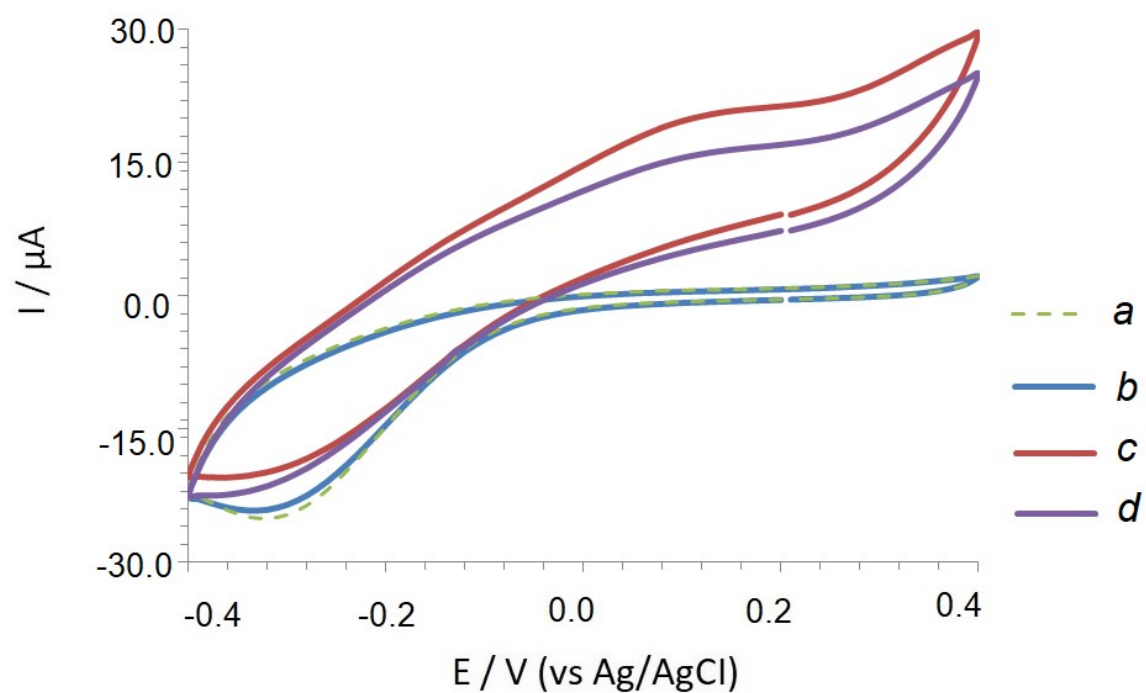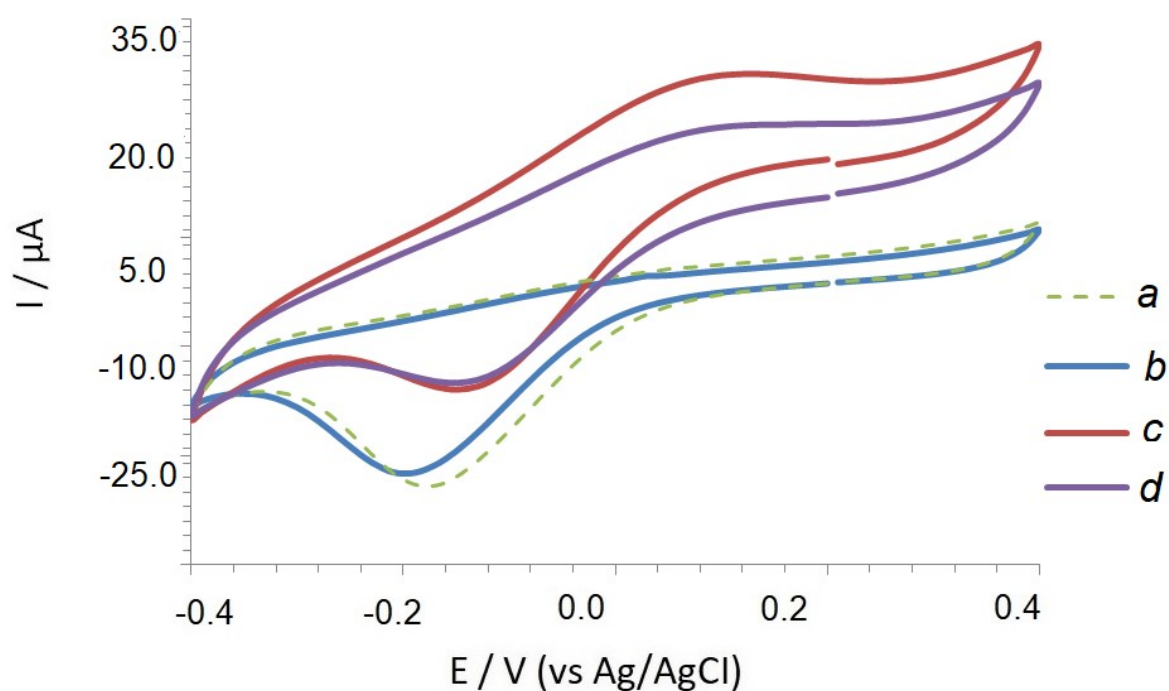

**Fig. S6** – Representative CV plots (second scans shown) recorded at 20 mV/s from Pd-NPs-based electrodes produced from the basic, **sample 2** (A) and acidic, **sample 1** (B) electrolytes: *a* – in HC medium; *b* – 1 mM of H<sub>2</sub>O<sub>2</sub> in HC medium (pH 4); *c* – 1 mM of N<sub>2</sub>H<sub>4</sub> in HC medium; *d* – mixture of 1 mM of H<sub>2</sub>O<sub>2</sub>+1 mM of N<sub>2</sub>H<sub>4</sub> in HC medium.

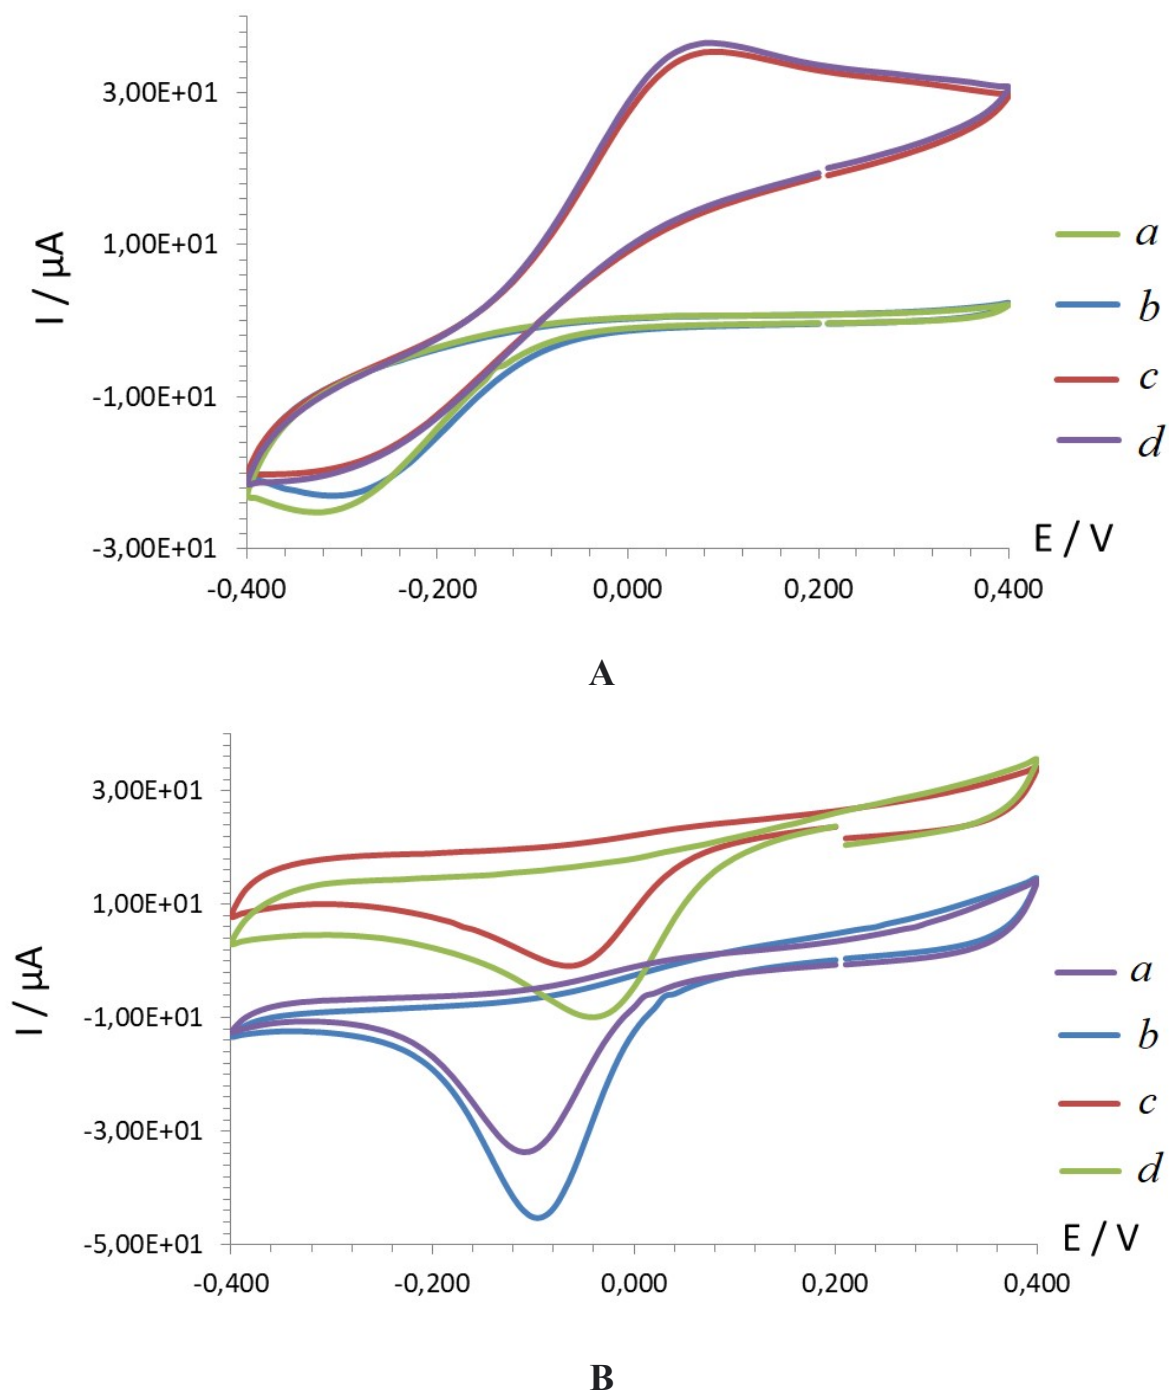

**Fig. S7** – Representative CV plots (vs Ag/AgCl, second scans shown) recorded at 20 mV/s from Pd-NPs-modified electrodes (**sample 2**) in (A) acetate and (B) phosphate buffer solution spiked with target analytes: *a* – buffer; *b* – 1 mM of individual hydrogen peroxide; *c* – 1 mM of individual hydrazine; *d* – mixture of 1 mM of hydrazine + 1 mM of hydrogen peroxide. *Note:* Pd-NPs were produced from the basic electrolyte (oxides-based surface of electrodes).
